# Supplementary material for: Selective synthesis of visible light active γ-bismuth molybdate nanoparticles for efficient photocatalytic degradation of methylene blue, reduction of 4-nitrophenol, and antimicrobial activity
Source: Royal Society of Chemistry journal article supplement (doi:10.1039/d0ra07459d), 2020-01-01
Supplement: d0ra07459d1.pdf [file d0ra07459d1.pdf]

## Supplementary Information

### Selective synthesis of visible light active $\gamma$ -Bismuth Molybdate nanoparticles for efficient photocatalytic degradation of methylene blue, reduction of 4-nitrophenol and antimicrobial activity

B. Lavakusa<sup>\*1</sup>, Dharmaoth Ramadevi<sup>2</sup>, Neway Belachew<sup>3</sup>, and K. Basavaiah<sup>4</sup>

<sup>1</sup>VKR College, Buddhavaram, Gannavaram-521101

<sup>2</sup>A.U. College of Pharmaceutical Sciences, Andhra University, Visakhapatnam-530003, India

<sup>3</sup>Department of chemistry, Debre Berhan University, Debre Berhan, Ethiopia

<sup>4</sup>Department Of Inorganic and Analytical Chemistry, Andhra University, Visakhapatnam, India-530003

\*Corresponding author (\*): lavakusa99@gmail.com

#### SI. 1: Agar media preparation

The Mueller Hinton agar medium was used for bacteria development due to its acceptable reproducibility and satisfactory growth of most pathogens<sup>28</sup>. Typically, the agar medium was prepared by dissolving synthetic Mueller-Hinton agar powder in distilled water. The medium was adjusted to pH=7 with 1N NaOH and made up to 1L. The medium and Petri plates (100 mm x 15 mm) were autoclaved at 121 °C, 15 lbs for 20 min. The autoclaved medium was allowed to cool to 45 °C and transferred into Petri plates (20 ml/plate) under disinfected conditions of laminar air-flow.

#### SI.2: Antimicrobial Activity for Agar-well diffusion method

The antimicrobial activity of synthesized  $\gamma$ -Bi<sub>2</sub>MoO<sub>6</sub> NP's was carried out by using the Agar-Well diffusion method. The medium was sterilized by autoclaving at 120 °C (15lb/in<sup>2</sup>). About

20 mL of the nutrient agar medium/potato agar seeded with the respective strains bacteria/fungal were transferred aseptically into each sterilized Petri plate. The plates were left at room temperature for solidification. In each plate, a single well of 6 mm diameter was made using a sterile borer. The test compounds were freshly reconstituted with suitable solvents (DMSO) and tested at various concentrations (10 mg/ml, 5 mg/ml, 2.5 mg/ml). The samples and the control along with standard (Ciprofloxacin - Antibiotic drug, Clotrimazole – Antifungal drug) were placed in 6 mm diameter well. In antimicrobial assays, fungal plates were incubated at  $28\pm 2^{\circ}\text{C}$  while  $37\pm 2^{\circ}\text{C}$  for bacteria. Standard with 10 mg/ml was used as a positive control for antimicrobial activity. The diameter of the zone of inhibition was measured using the Himedia antibiotic zone scale.

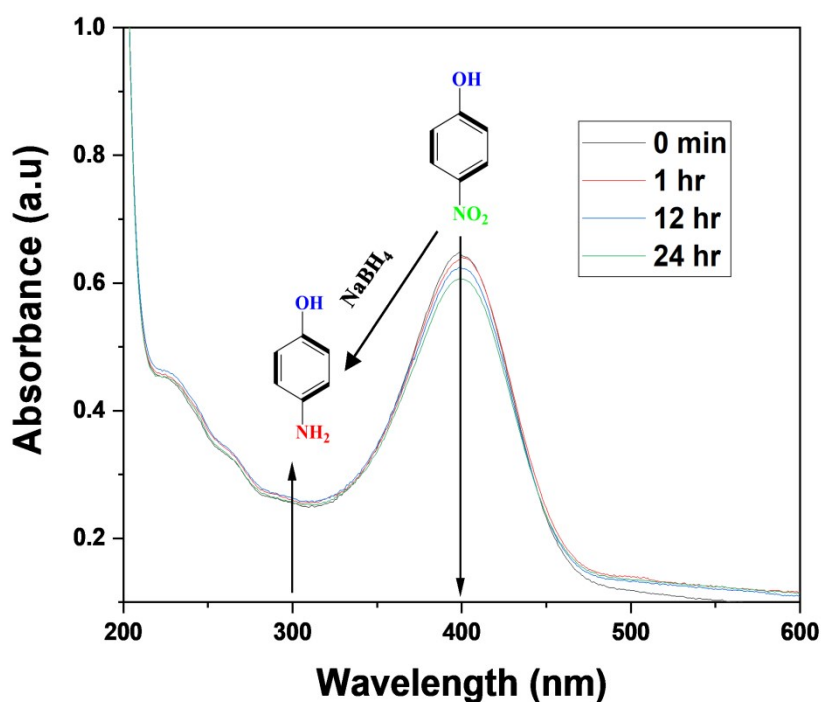

Fig S1: The reduction of 4-NP by  $\text{NaBH}_4$ .

**Table S1: The anti-microbial activity with BM2 catalyst at different concentration**

| <b>Micro-organism</b>                           | <b>Zone inhibition (mm)</b>   |               |                 |                                             |                                   |
|-------------------------------------------------|-------------------------------|---------------|-----------------|---------------------------------------------|-----------------------------------|
|                                                 | <b>Catalyst Concentration</b> |               |                 | <b>Standard<br/>(reference)<br/>10mg/ml</b> | <b>DMSO<br/>(solvent)<br/>1ml</b> |
|                                                 | <b>10mg/ml</b>                | <b>5mg/ml</b> | <b>2.5mg/ml</b> |                                             |                                   |
| <i>Escherichia Coli –<br/>Gram negative</i>     | 10                            | 10            | 9               | 35                                          | 0                                 |
| <i>Staphylococcus aureus-<br/>Gram positive</i> | 10                            | 12            | 10              | 40                                          | 0                                 |
| <i>Aspergillus niger</i>                        | 18                            | 11            | 10              | 31                                          | 0                                 |
